# Supplementary material for: IL-7 promotes mRNA vaccine-induced long-term immunity
Source: PubMed Central journal article supplement — J Nanobiotechnology. 2024 Nov 16;22:716. doi: 10.1186/s12951-024-02993-5 (PMC11568559; doi:10.1186/s12951-024-02993-5), 2024-11-16
Supplement: 12951_2024_2993_MOESM1_ESM.pdf [file 12951_2024_2993_MOESM1_ESM.pdf]

## Supporting information for

### **IL-7 promotes mRNA vaccine-induced long-term immunity**

Lingli Wang<sup>1,2,3,4,5</sup>, Jiawu Wan<sup>1,2,3,4,5</sup>, Wenna He<sup>1,2,3,4</sup>, Zongmei Wang<sup>1,2,3,4</sup>, Qiong Wu<sup>1,2,3,4</sup>, Ming Zhou<sup>1,2,3,4</sup>, Zhen F. Fu<sup>1,2,3,4</sup>, Ling Zhao<sup>1,2,3,4,6,\*</sup>

<sup>1</sup>National Key Laboratory of Agricultural Microbiology, Huazhong Agricultural University, Wuhan 430070, China

<sup>2</sup>Hubei Hongshan Laboratory, Wuhan 430070, China

<sup>3</sup>Frontiers Science Center for Animal Breeding and Sustainable Production, Wuhan 430070, China

<sup>4</sup>Key Laboratory of Preventive Veterinary Medicine of Hubei Province, College of Veterinary Medicine, Huazhong Agricultural University, Wuhan 430070, China

<sup>5</sup>These authors contributed equally

<sup>6</sup>Lead contact

\*Correspondence: Ling Zhao, [zling604@outlook.com](mailto:zling604@outlook.com), [lingzhao@mail.hzau.edu.cn](mailto:lingzhao@mail.hzau.edu.cn)

**This file includes: Fig. S1 to S7**

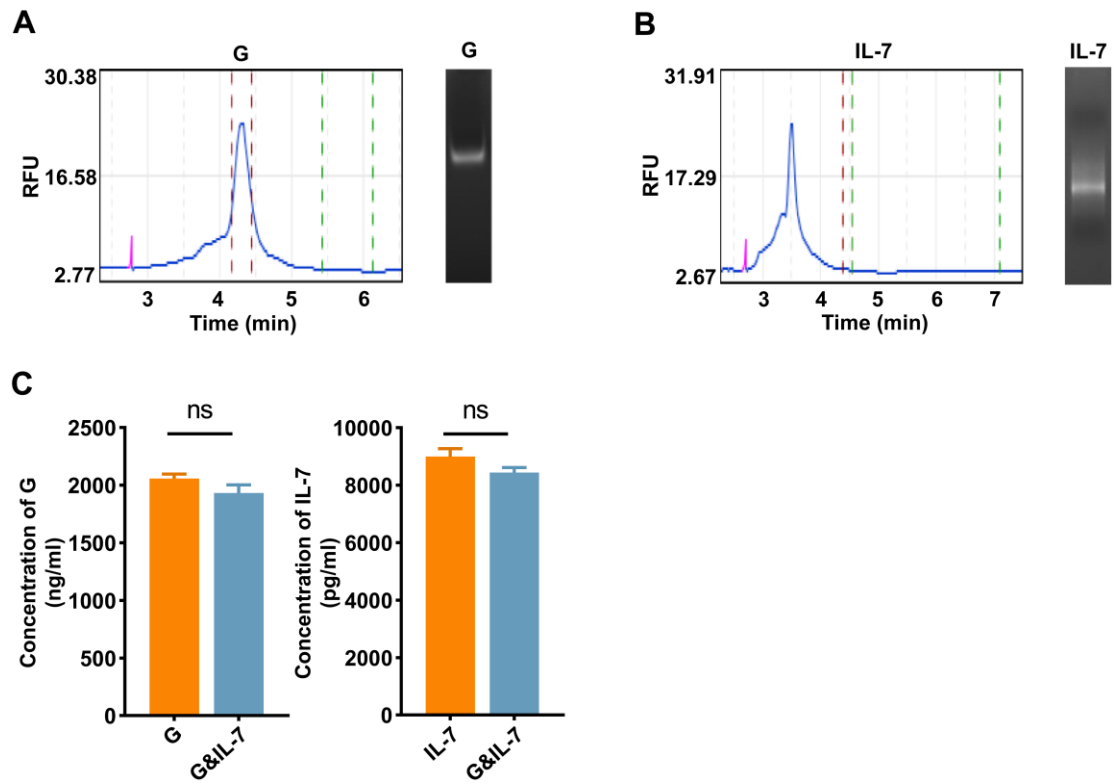

**Figure S1. The quality and expression of the in vitro-transcribed mRNA.** (A) The capillary electropherograms and agarose gel electropherograms of G mRNA. (B) The capillary electropherograms and agarose gel electropherograms of IL-7 mRNA. (C) HEK-293T cells were transfected with LNP-encapsulated G mRNA (1  $\mu$ g), IL-7 mRNA (1  $\mu$ g) or G&IL-7 mRNA (1  $\mu$ g G mRNA + 1  $\mu$ g IL-7 mRNA). After 24 hours, ELISA was performed to measure the expression levels of G and IL-7 in the cell lysates (n = 3).

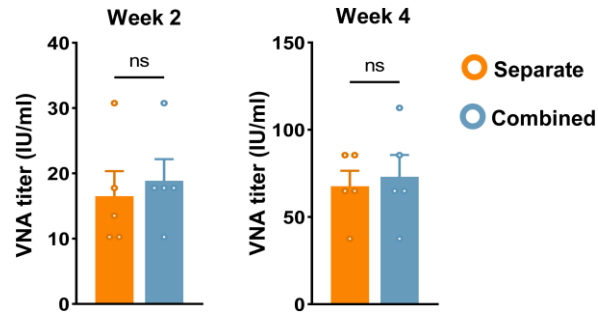

**Figure S2. Different encapsulation strategies of IL-7 mRNA as an adjuvant.** Mice were immunized using two different mRNA encapsulation methods: G mRNA and IL-7 mRNA were either co-encapsulated in the same lipid nanoparticle (LNP) for injection or separately encapsulated in individual LNPs and then mixed prior to injection. Virus-neutralizing antibody (VNA) titers were assessed using fluorescent antibody virus neutralization (FAVN) assays (n = 5).

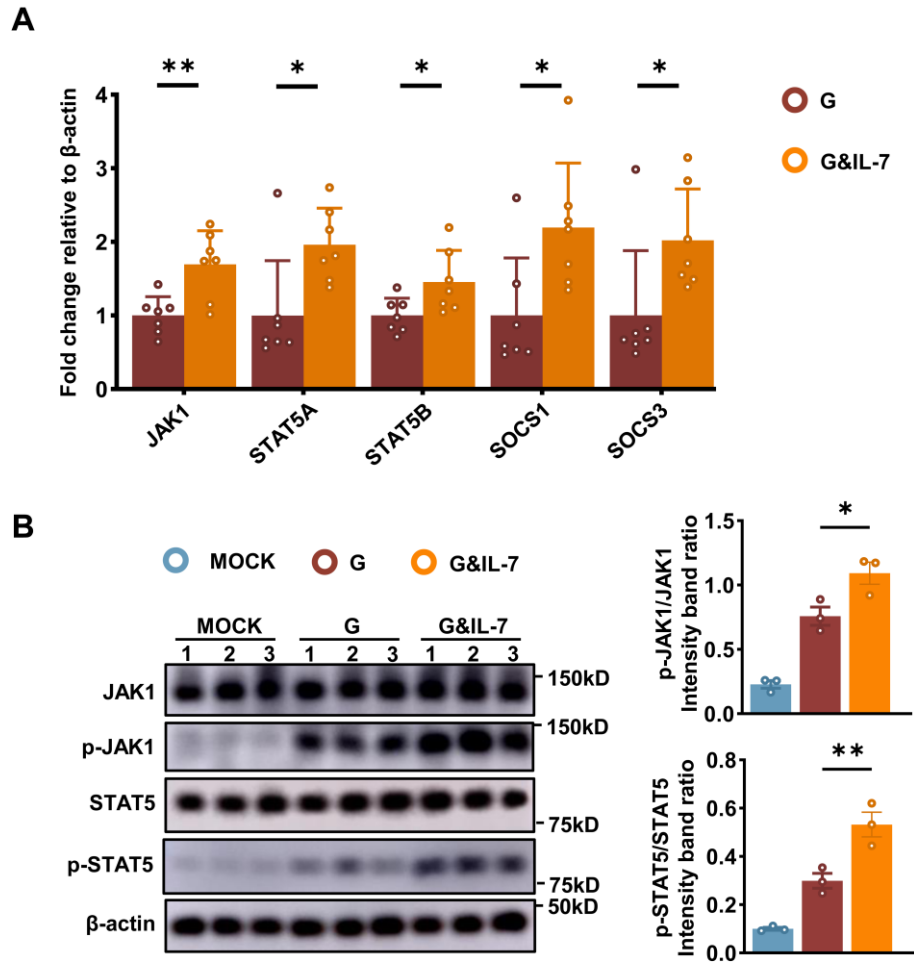

**Figure S3. Expression levels of key genes and proteins in the JAK-STAT signaling pathway in mRNA vaccine-immunized and control mice.** (A) The mRNA expression levels of JAK1, STAT5A, STAT5B, SOCS1, and SOCS3 in the inguinal lymph nodes (LNs) of mice ( $n = 7$ ) inoculated with G mRNA and G&IL-7 mRNA. (B) The LNs from mice ( $n = 3$ ) inoculated with G mRNA, G&IL-7 mRNA, and PBS were collected and homogenized. Western blotting was performed to assess the expression levels of JAK1, phosphorylated JAK1 (p-JAK1), STAT5, and phosphorylated STAT5 (p-STAT5).

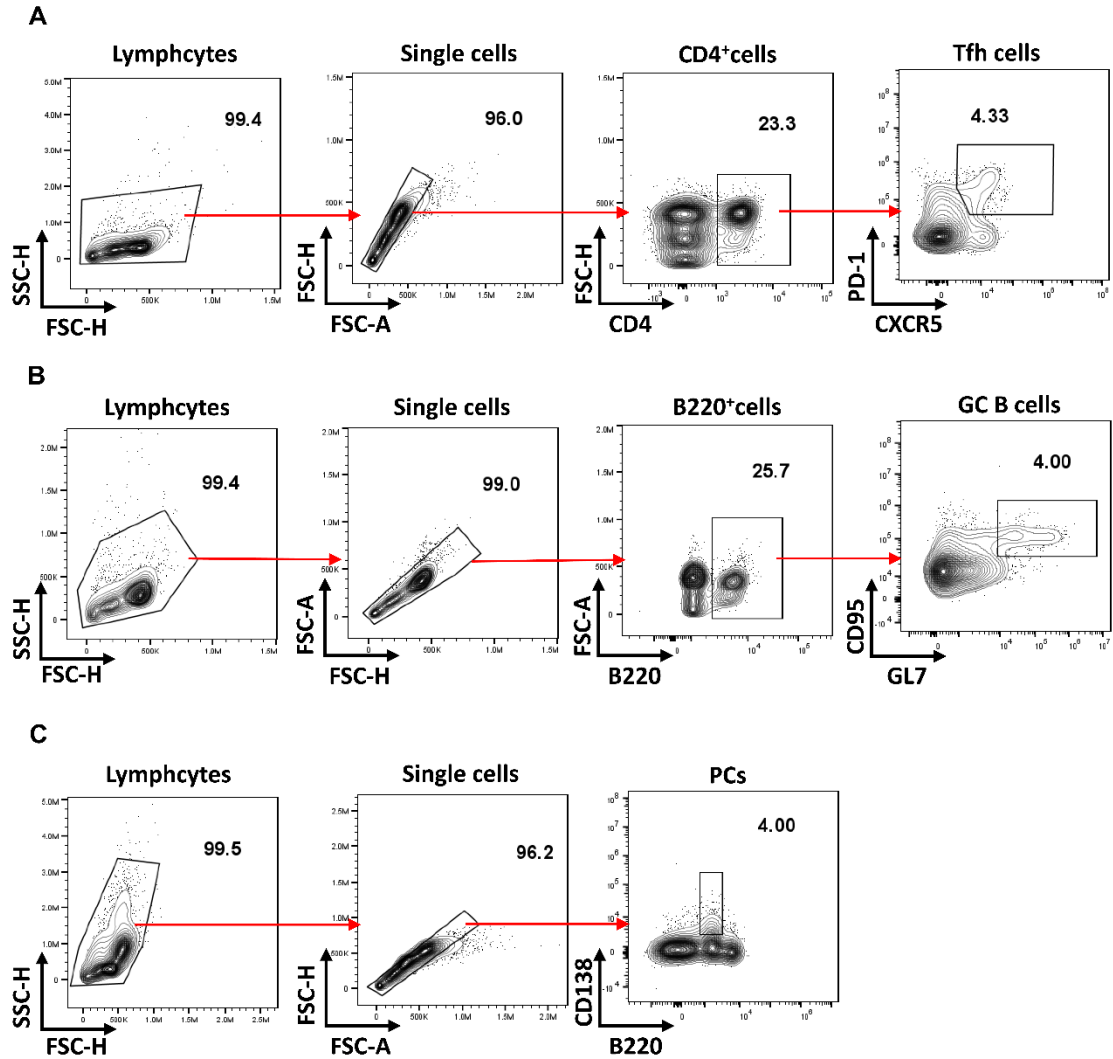

**Figure S4. Flow cytometry gating strategy for the detection of Tfh cells, GC B cells and PCs. (A)** Gating strategy to identify Tfh cells ( $CD4^+CXCR5^+PD1^+$ ). **(B)** Gating strategy to identify GC B cells ( $B220^+GL7^+CD95^+$ ). **(C)** Gating strategy to identify PCs ( $B220^{low}CD138^+$ ).

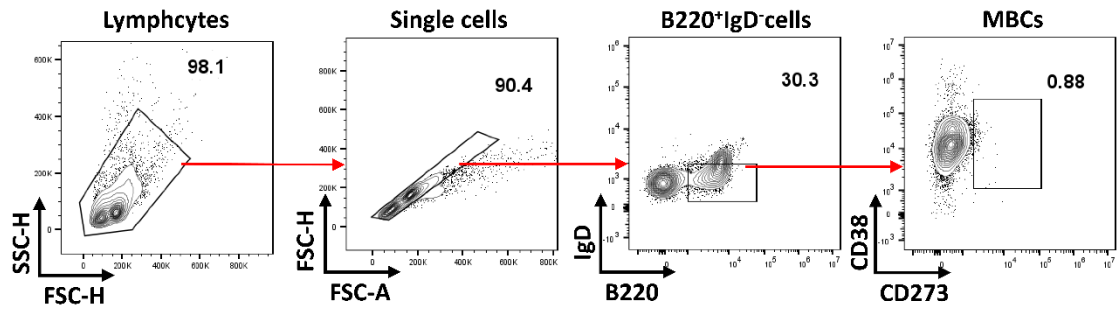

**Figure S5. Flow cytometry gating strategy for the detection of MBCs.** Gating strategy to identify MBCs (B220<sup>+</sup>IgD<sup>-</sup>CD273<sup>+</sup>CD38<sup>+</sup>).

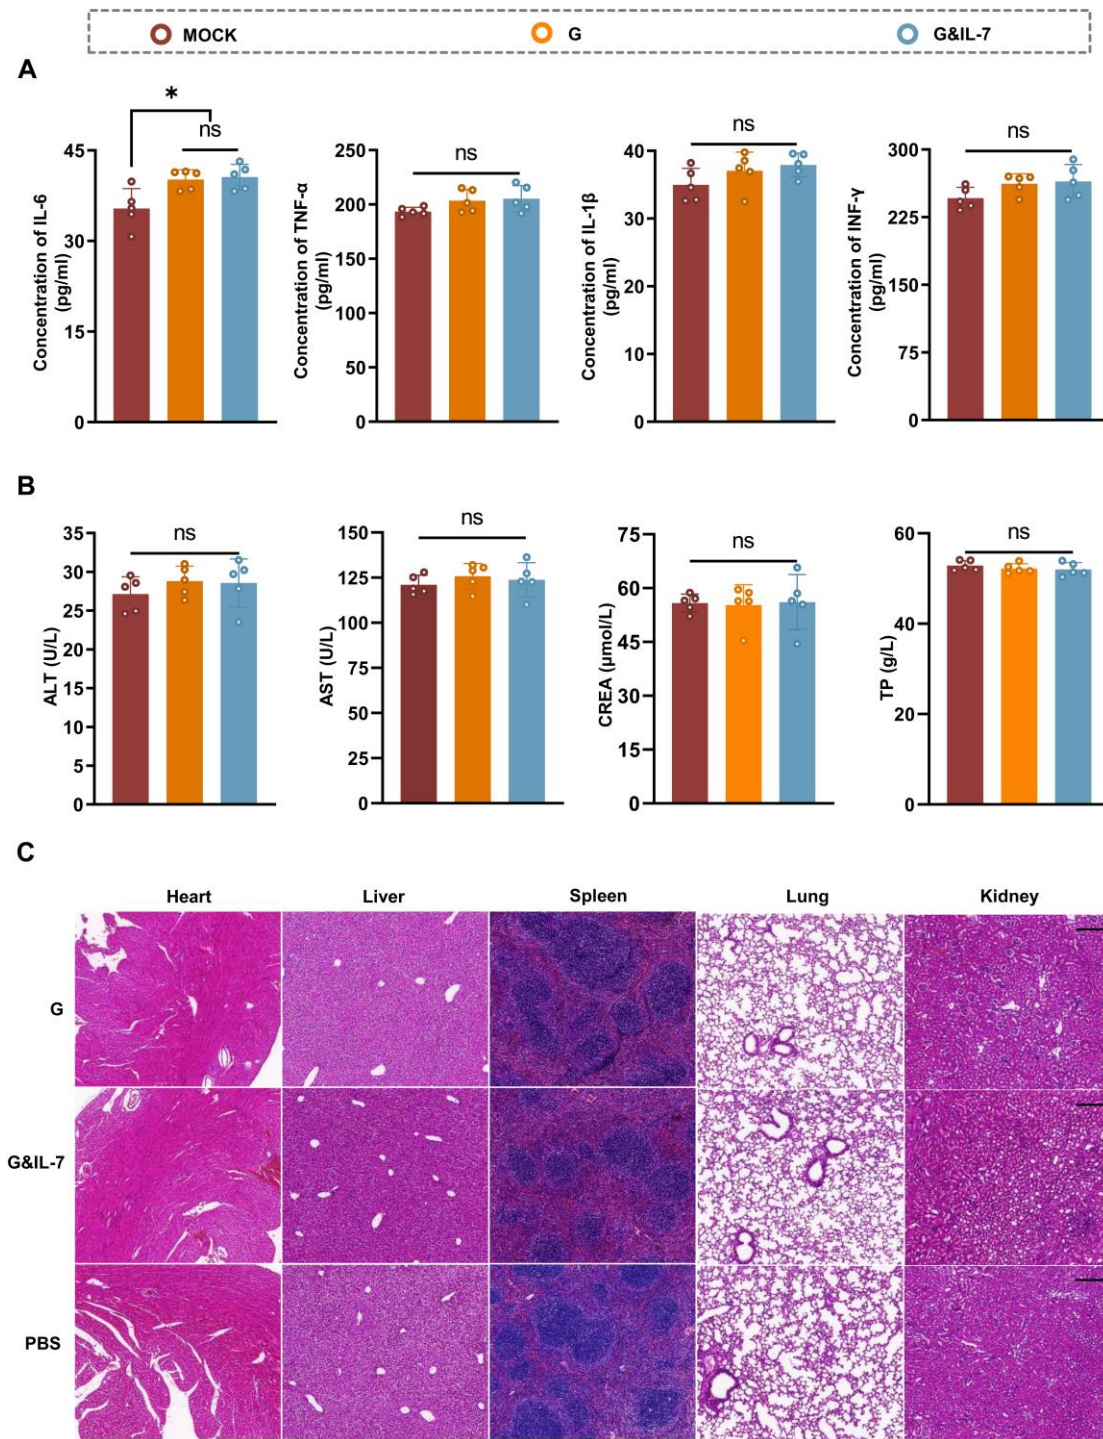

**Figure S6. Safety evaluation of G&IL-7 mRNA.** Vaccination of C57BL/6 mice via intramuscular injection with G mRNA, G&IL-7 mRNA or PBS, respectively. (A) Cytokine levels in the serum samples from mice were detected (n = 5). (B) The biochemical indicators of mice were analyzed using an automated hematological biochemical analyzer (n = 5). (C) Hematoxylin and eosin (H&E) staining was conducted on the major organs of mice on day 2. Scale bars represent 200 μm.

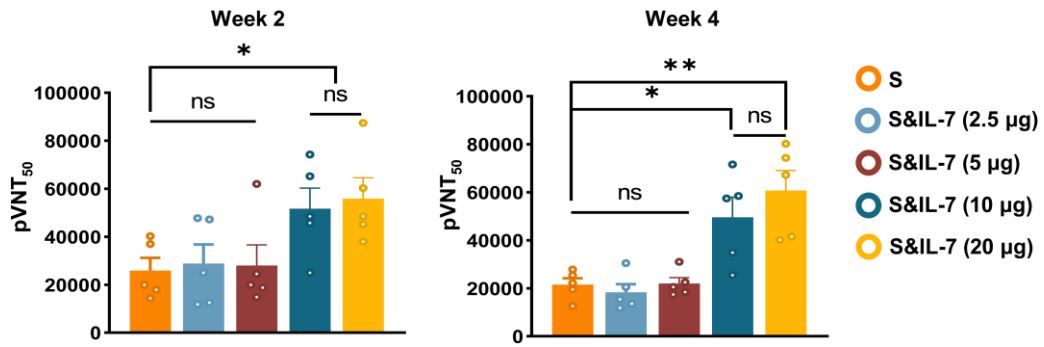

**Figure S7. IL-7 mRNA concentration screening as an adjuvant for SARS-CoV-2 mRNA vaccine.** Mice were immunized with S mRNA encapsulated alongside varying concentrations of IL-7 mRNA. Neutralizing antibodies against the original Wuhan strain were assessed using a pseudovirus neutralization assay (n = 5).
